# Supplementary material for: Identifying priorities, directions and a vision for Indigenous mental health using a collaborative and consensus-based facilitation approach
Source: Springer Nature journal article supplement (doi:10.1186/s12913-022-07682-3), 2022-03-27
Supplement: MOESM1 [file 20259636]

# OUR VISION: HEALTHY MINDS, HEALTHY COMMUNITIES

**VISION**

UTILIZE THE **MEDICINE WHEEL**

CHAMPIONING **SOVEREIGNTY**  
 Community health workers  
 from local Indigenous  
 communities

**EXPERTISE OF ELDERS**  
 Gather with  
 the  
 wisdom of  
 the  
 Elders

**INDIGENOUS HEALTH ADVISORY**

**INDIGENOUS MEDICAL NURSING STUDENTS**  
 to be involved

**MUNICIPAL LEADERS + LOCAL LEADERS IN CONVERSATION**

**COMMUNITY BASED HEALTH CARE**

CREATE SPACES FOR HEALTHY PLAY, HOMES + LAND SO THAT PEOPLE EXPERIENCE BELONGING

and FIND A PATH HOME to BE THE INDIVIDUAL, SON, DAUGHTER, MOTHER, FATHER, COMMUNITY MEMBER THEY WANT TO BE.

**INDIGENOUS RESOURCES**

IT'S TIME FOR **BRAIN HEALTH** WHERE EACH INDIVIDUAL MATTERS

AS WE MOVE FORWARD IN A POSITIVE WAY WE HAVE THE ABILITY TO MOVE TO HEALTHIER COMMUNITIES

BE STRONG + PERSEVERE FOR MORE LEARNING + GROWING

**HEALTHY YOU HEALTHY COMMUNITY**

WE DON'T LIVE IN FEAR

**EARLY INTERVENTION IN SCHOOLS**

FULLY STAFFED SCHOOL  
 building complete for year 2022-2023

**HOMELESSNESS**  
 NO LONGER EXISTS

HAVE MORE INDIGENOUS PEOPLE EDUCATED IN THE MEDICAL HEALTH PROFESSION SO THAT WE COME TOGETHER AS A COMMUNITY IN ORDER TO OVERCOME BARRIERS THAT IMPED OUR HOLISTIC CULTURAL MENTAL HEALTH WELLBEING

AND BECOME ONE COMMUNITY

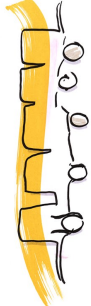

AN **INDIGENOUS, CULTURALLY INTEGRATED HEALTH CARE SYSTEM**

Being aware that there is a transitional period as we move toward sovereign health care to secure funding separate from government

**GUIDING PRINCIPLES**

**BREAKING THE STIGMA**

BY CHANGING HOW WE TALK ABOUT AND DEFINE BRAIN HEALTH emotional + spiritual

RESPECTING CULTURAL KNOWLEDGE OF MEDICINES, APPROACHES AND WAYS OF KNOWING

Approach it from a strength + resilience perspective

INCORPORATING THE **MEDICINE WHEEL** IN CARING FOR THE COMMUNITY

HARNESS THE **FOUR ELEMENTS** water - air - mother earth - fire to RESTORE BALANCE

RESTORING THE **HEALTHY FAMILY SYSTEM** BY SUPPORTING PARENTS, ELDERS + CAREGIVERS

FOCUS ON THE POSITIVE
