# Supplementary material for: Identifying priorities, directions and a vision for Indigenous mental health using a collaborative and consensus-based facilitation approach
Source: Springer Nature journal article supplement (doi:10.1186/s12913-022-07682-3), 2022-03-27
Supplement: MOESM2 [file 20259636]

# MOVING FORWARD TOGETHER

SUPPORTING INDIGENOUS LED, CULTURALLY SAFE AND EQUITABLE MENTAL HEALTH CARE ACCESS

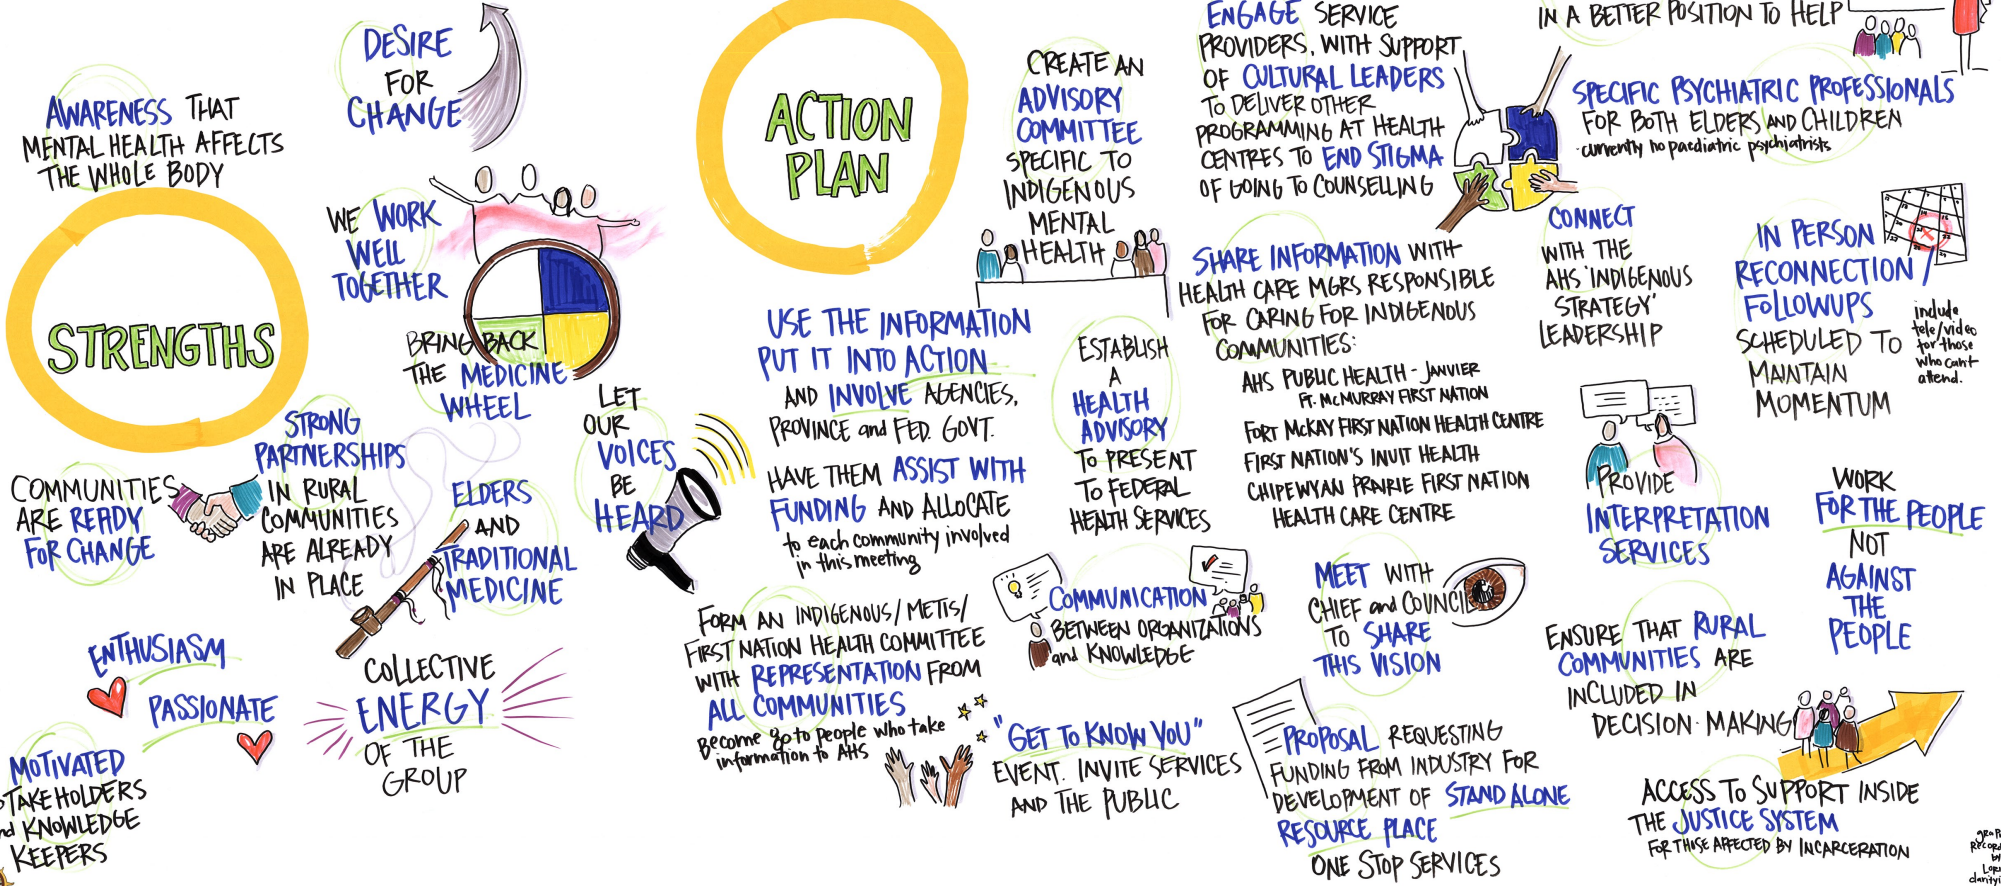

AWARENESS THAT MENTAL HEALTH AFFECTS THE WHOLE BODY

DESIRE FOR CHANGE

WE WORK WELL TOGETHER

STRENGTHS

COMMUNITIES ARE READY FOR CHANGE

STRONG PARTNERSHIPS IN RURAL COMMUNITIES ARE ALREADY IN PLACE

ENTHUSIASM PASSIONATE

MOTIVATED STAKEHOLDERS AND KNOWLEDGE KEEPERS

BRING BACK THE MEDICINE WHEEL

ELDER'S AND TRADITIONAL MEDICINE

COLLECTIVE ENERGY OF THE GROUP

ACTION PLAN

USE THE INFORMATION PUT INTO ACTION AND INVOLVE AGENCIES, PROVINCE AND FED. GOVT. HAVE THEM ASSIST WITH FUNDING AND ALLOCATE TO EACH COMMUNITY INVOLVED IN THIS MEETING

LET OUR VOICES BE HEARD

FORM AN INDIGENOUS/METIS/FIRST NATION HEALTH COMMITTEE WITH REPRESENTATION FROM ALL COMMUNITIES

COMMUNICATION BETWEEN ORGANIZATIONS AND KNOWLEDGE

MEET WITH CHIEF AND COUNCIL TO SHARE THIS VISION

"GET TO KNOW YOU" EVENT. INVITE SERVICES AND THE PUBLIC

PROPOSAL REQUESTING FUNDING FROM INDUSTRY FOR DEVELOPMENT OF STAND ALONE RESOURCE PLACE ONE STOP SERVICES

CREATE AN ADVISORY COMMITTEE SPECIFIC TO INDIGENOUS MENTAL HEALTH

ENGAGE SERVICE PROVIDERS, WITH SUPPORT OF CULTURAL LEADERS TO DELIVER OTHER PROGRAMMING AT HEALTH CENTRES TO END STIGMA OF GOING TO COUNSELLING

SHARE INFORMATION WITH HEALTH CARE MGRS RESPONSIBLE FOR CARING FOR INDIGENOUS COMMUNITIES:

- AHS PUBLIC HEALTH - JANVIER FT. McMURRAY FIRST NATION
- FORT MCKAY FIRST NATION HEALTH CENTRE
- FIRST NATION'S INUIT HEALTH CHIPEWYAN PRARIE FIRST NATION HEALTH CARE CENTRE

ESTABLISH A HEALTH ADVISORY TO PRESENT TO FEDERAL HEALTH SERVICES

TRAINING FOR NON-INDIGENOUS IN A BETTER POSITION TO HELP

SPECIFIC PSYCHIATRIC PROFESSIONALS FOR BOTH ELDER'S AND CHILDREN

CONNECT WITH THE AHS 'INDIGENOUS STRATEGY' LEADERSHIP

RECONNECTION/FOLLOWUPS SCHEDULED TO MAINTAIN MOMENTUM

PROVIDE INTERPRETATION SERVICES

WORK FOR THE PEOPLE NOT AGAINST THE PEOPLE

ENSURE THAT RURAL COMMUNITIES ARE INCLUDED IN DECISION MAKING

ACCESS TO SUPPORT INSIDE THE JUSTICE SYSTEM FOR THOSE AFFECTED BY INCARCERATION

TO BE

include tele/video for those who can't attend.
